# Supplementary material for: Microscopic Haematuria and Clinical Outcomes in Patients With Stage 3–5 Nondiabetic Chronic Kidney Disease
Source: PubMed Central journal article supplement (PMC4607953; doi:10.1038/srep15242), 2015-10-16
Supplement: srep15242-s1.pdf [file srep15242-s1.pdf]

## **Microscopic Haematuria and Clinical Outcomes in Patients With Stage 3–5**

### **Nondiabetic Chronic Kidney Disease**

Hugo You-Hsien Lin<sup>1,2,3</sup>, Chun-Yu Yen<sup>1,6</sup>, Lee-Moay Lim<sup>1</sup>, Daw-Yang Hwang<sup>1</sup>,  
Jer-Chia Tsai<sup>1,4</sup>, Shang-Jyh Hwang<sup>1,4,5</sup>, Chi-Chih Hung<sup>1</sup>, Hung-Chun Chen<sup>1,4</sup>

1. Division of Nephrology, Department of Internal Medicine, Kaohsiung Medical University Hospital, Kaohsiung Medical University
2. Department of Internal Medicine, Kaohsiung Municipal Ta-Tung Hospital, Kaohsiung Medical University
3. Graduate Institute of Medicine, College of Medicine, Kaohsiung Medical University, Kaohsiung, Taiwan
4. Faculty of Renal Care, College of Medicine, Kaohsiung Medical University, Kaohsiung, Taiwan
5. Institute of Population Sciences, National Health Research Institutes, Miaoli, Taiwan
6. Department of Pediatrics, Taipei Veterans General Hospital, Taipei, Taiwan, R.O.C.

Supplement Table 1. Cox regression for ESRD and mortality according to haematuria and urine occult blood

|                                          | <b>Haematuria</b>         |                      | <b>P- value</b> |
|------------------------------------------|---------------------------|----------------------|-----------------|
|                                          | <b>No</b>                 | <b>Mild+Moderate</b> |                 |
| <b><i>HR for ESRD</i></b>                |                           |                      |                 |
| Unadjusted                               | 1 (reference)             | 2.34 (1.96-2.79)**   | <0.001          |
| Fully-adjusted                           | 1 (reference)             | 1.29 (1.07-1.56)*    | 0.007           |
| <b><i>HR for all-cause mortality</i></b> |                           |                      |                 |
| Unadjusted                               | 1 (reference)             | 1.80 (1.40-2.31)**   | <0.001          |
| Fully-adjusted                           | 1 (reference)             | 1.28 (0.98-1.66)     | 0.067           |
|                                          | <b>Urine occult blood</b> |                      | <b>P- value</b> |
|                                          | <b>No</b>                 | <b>+ ~ +++</b>       |                 |
| <b><i>HR for ESRD</i></b>                |                           |                      |                 |
| Unadjusted                               | 1 (reference)             | 4.92 (3.78-6.39)**   | <0.001          |
| Fully-adjusted                           | 1 (reference)             | 1.33 (1.01-1.75)*    | 0.041           |
| <b><i>HR for all-cause mortality</i></b> |                           |                      |                 |
| Unadjusted                               | 1 (reference)             | 1.44 (1.09-1.90)*    | 0.010           |
| Fully-adjusted                           | 1 (reference)             | 1.07 (0.79-1.44)     | 0.669           |

Model adjusts for age, gender, eGFR, log-transformed UPCR, hypertension, cardiovascular disease, mean BP, BMI, hemoglobin, albumin, log-transformed cholesterol, log-transformed CRP and phosphorus.

\* ( $P < 0.05$ ) or \*\* ( $P < 0.01$ ) indicates a significantly different from reference group
